# A Network Analysis of Countries' Export Flows: Firm Grounds for the Building Blocks of the Economy

Guido Caldarelli<sup>1,2,3</sup>, Matthieu Cristelli<sup>2,4\*</sup>, Andrea Gabrielli<sup>2,3</sup>, Luciano Pietronero<sup>2,4,3</sup>, Antonio Scala<sup>2,3</sup>, Andrea Tacchella<sup>4,2</sup>

**1** IMT - Institutions Market Technology, Lucca, Italy, **2** ISC-CNR - Institute of Complex Systems, Rome, Italy, **3** LIMS - London Institute for Mathematical Sciences, London, United Kingdom, **4** Department of Physics, University of Rome "Sapienza", Rome, Italy

## Abstract

In this paper we analyze the bipartite network of countries and products from UN data on country production. We define the country-country and product-product projected networks and introduce a novel method of filtering information based on elements' similarity. As a result we find that country clustering reveals unexpected socio-geographic links among the most competing countries. On the same footings the products clustering can be efficiently used for a bottom-up classification of produced goods. Furthermore we mathematically reformulate the "reflections method" introduced by Hidalgo and Hausmann as a fixpoint problem; such formulation highlights some conceptual weaknesses of the approach. To overcome such an issue, we introduce an alternative methodology (based on biased Markov chains) that allows to rank countries in a conceptually consistent way. Our analysis uncovers a strong non-linear interaction between the diversification of a country and the ubiquity of its products, thus suggesting the possible need of moving towards more efficient and direct non-linear fixpoint algorithms to rank countries and products in the global market.

**Citation:** Caldarelli G, Cristelli M, Gabrielli A, Pietronero L, Scala A, et al. (2012) A Network Analysis of Countries' Export Flows: Firm Grounds for the Building Blocks of the Economy. PLoS ONE 7(10): e47278. doi:10.1371/journal.pone.0047278

**Editor:** Alessandro Flammini, Indiana University, United States of America

**Received:** August 12, 2011; **Accepted:** September 14, 2012; **Published:** October 19, 2012

**Copyright:** © 2012 Caldarelli et al. This is an open-access article distributed under the terms of the Creative Commons Attribution License, which permits unrestricted use, distribution, and reproduction in any medium, provided the original author and source are credited.

**Funding:** Supporting Grant: EU Future and Emerging Technologies (FET) Open project FOC nr.255987. The funders had no role in study design, data collection and analysis, decision to publish, or preparation of the manuscript.

**Competing Interests:** The authors have declared that no competing interests exist.

\* E-mail: matthieu.cristelli@roma1.infn.it

## Introduction

### Complex Networks

Networks emerged in the recent years as the main mathematical tool for the description of complex systems. In particular, the mathematical framework of graph theory made possible to extract relevant information from different biological and social systems [1–3]. In this paper we use some concepts of network theory to address the problem of economic complexity [4–7].

Our activity is in the track of a long-standing interaction between economics and physical sciences [8–12] and it explains, extends and complements a recent analysis done on the network of trades between nations [13,14]. Hidalgo and Hausmann (HH) address the problem of competitiveness and robustness of different countries in the global economy by studying the differences in the Gross Domestic Product and assuming that the development of a country is related to different "capabilities". While countries cannot directly trade capabilities, it is the specific combination of those capabilities that results in different products traded. More capabilities are supposed to bring higher returns and the accumulation of new capabilities provides an exponentially growing advantage. Therefore the origin of the differences in the wealth of countries can be inferred by the record of trading activities analyzed as the expressions of the capabilities of the countries.

### Revealed Competitive Advantage and the country-product Matrix

We consider here the Standard Trade Classification data for the years in the interval 1992–2000. In the following we shall analyze the year 2000, but similar results apply for the other snapshots. For the year 2000 the data provides information on  $N_c = 129$  different countries and  $N_p = 772$  different products.

To make a fair comparison between the trades, it is useful to employ Balassa's Revealed Comparative Advantage (RCA) [15] i.e. the ratio between the export share of product  $p$  in country  $c$  and the share of product  $p$  in the world market

$$RCA_{cp} = \frac{X_{cp}}{\sum_{p'} X_{cp'}} / \frac{\sum_{c'} X_{c'p}}{\sum_{c',p'} X_{c'p'}} \quad (1)$$

where  $X_{cp}$  represents the dollar exports of country  $c$  in product  $p$ .

We consider country  $c$  to be a competitive exporter of product  $p$  if its RCA is larger than some threshold value, which we take as 1 as in standard economics literature; previous studies have verified that small variations around such threshold do not qualitatively change the results.

The network structure of the country-product competition is given by the semipositive matrix  $\hat{M}$  defined as

$$M_{cp} = \begin{cases} 1 & \text{if } RCA_{cp} > R^* \\ 0 & \text{if } RCA_{cp} < R^* \end{cases} \quad (2)$$

where  $R^*$  is the threshold ( $R^* = 1$ ).

To such matrix  $\hat{M}$  we can associate a graph whose nodes are divided into two sets  $\{c\}$  of  $N_c$  nodes (the countries) and  $\{p\}$  of  $N_p$  nodes (the products) where a link between a node  $c$  and a node  $p$  exists if and only if  $M_{cp} = 1$ , i.e. a bipartite graph. The matrix  $\hat{M}$  is strictly related to the adjacency matrix of the country-product bipartite network.

The fundamental structure of the matrix  $\hat{M}$  is revealed by ordering the rows of the matrix by the number of exported products and the columns by the number of exporting countries: doing so,  $\hat{M}$  assumes a substantially triangular structure. Such structure reflects the fact that some countries export a large fraction of all products (highly diversified countries), and some products appear to be exported by most countries (ubiquitous products). Moreover, the countries that export few products tend to export only ubiquitous products, while highly diversified countries are the only ones to export the products that only few other countries export.

This triangular structure is therefore revealing us that there is a systematic relationship between the diversification of countries and the ubiquity of the products they make. Poorly diversified countries have a revealed comparative advantage (RCA) almost exclusively in ubiquitous products, whereas the most diversified countries appear to be the only ones with RCAs in the less ubiquitous products which in general are of higher value on the market. It is therefore plausible that such structure reflects a ranking among the nations.

The fact that the matrix is triangular rather than block-diagonal suggests that some successful countries are more diversified than expected. Countries add more new products to the export mix while keeping, at the same time, their traditional productions. The structure of  $\hat{M}$  therefore contradicts most of classical macro-economical models that always predict a specialization of countries in particular sectors of production (i.e. countries should aggregate in communities producing similar goods) that would result in a more or less block-diagonal matrix  $\hat{M}$ .

In the following, we are going to analyze the economical consequences of the structure of the bipartite country-product graph described by  $\hat{M}$ . In particular, we analyze the community structure induced by  $\hat{M}$  on the countries and products projected networks. As a second step, we reformulate as a linear fixpoint algorithm the HH's *reflection method* to determine the countries and products respective rankings induced by  $\hat{M}$ . In this way we are able to clarify the critical aspects of this method and its mathematical weakness. Finally, to assign proper weights to the countries, we formulate a mathematically well defined biased Markov chain process on the country-product network; to account for the bipartite structure of the network, we introduce a two parameter bias in this method. To select the optimal bias, we compare the results of our algorithm with a standard economic indicator, the gross domestic product *GDP*. The optimal values of the parameters suggests a highly non-linear interaction between the number of different products produced by each country (*diversification*) and the number of different countries producing each product (*ubiquity*) in determining the competitiveness of countries and products. This fact suggests that, to better capture the essential features of economical competition of countries, we need a more direct and efficient non-linear approach.

## Results

### The Network of Countries

In order to obtain an immediate understanding of the economic relations between countries induced by their products a possible approach is to define a projection graph obtained from the original set of bipartite relations represented by the matrix  $\hat{M}$  [16]. The idea is to connect the various countries with a link whose strength is given by the number of products they mutually produce. In such a way the information stored in the matrix  $\hat{M}$  is projected into the network of countries as shown in Fig. 1.

The country network can be characterized by the  $(N_c \times N_c)$  country-country matrix  $\hat{C} = \hat{M}\hat{M}^T$ . The non-diagonal elements  $C_{cc'}$  correspond to the number of products that countries  $c$  and  $c'$  have in common (i.e. are produced by both countries). They are a measure of their mutual competition, allowing a quantitative comparison between economic and financial systems [17]; the diagonal elements  $C_{cc}$  corresponds to the number of products produced by country  $c$  and are a measure of the diversification of country  $c$ .

To quantify the competition among two countries, we can define the similarity matrix among countries as

$$S_{cc'}^C = 2 \frac{C_{cc'}}{C_{cc} + C_{c'c'}}. \quad (3)$$

Note that  $0 \leq S_{cc'}^C \leq 1$  and that small (large) values indicate small (large) correlations between the products of the two countries  $c$  and  $c'$ . Similar approaches to define a correlation between vertices or a distance [18] have often been employed in the field of complex networks, for example to detect protein correlations [19] or to characterize the interdependencies among clinical traits of the orofacial system [20,21].

The first problem for large correlation networks is how to visualize the relevant structure. The simplest approach to visualize the most similar vertices is realized by building a Minimal Spanning Tree (MST) [22,23]. In this method, starting from an empty graph, edges  $(c, c')$  are added in order of decreasing similarity until all the nodes are connected; to obtain a tree, edges that would introduce a loop are discarded. A further problem is to split the graph in smaller sub-graphs (communities) that share important common feature, i.e. have strong correlations. *Similarity*, like analogous correlation indicators, can be used to detect the inner structure of a network; while different methods for community detection vary in their detailed implementation [24,25], they give reasonably similar qualitative results when the indicators contain the same information.

The MST method can be thus generalized in order to detect the presence of communities by adding the extra condition that no edge between two nodes that have been already connected to some other node is allowed. In this way we obtain a set of disconnected sub-trees (i.e. a forest) embedded in the MST. This *Minimal Spanning Forest* (MSF) method naturally splits the network of countries into separate subsets. This method allows for the visualization of the correlations in a large network and at the same time performs a sort of community detection if not precise, certainly very fast.

By visual inspection in Fig. 2 we can spot a large subtree composed by developed countries and some other subtrees in which clear geographical correlations are present. Notice that each subtree contains countries with very similar products, i.e. countries that are competing on the same markets. In particular, developing countries seem to be mostly direct competitors of their geograph-

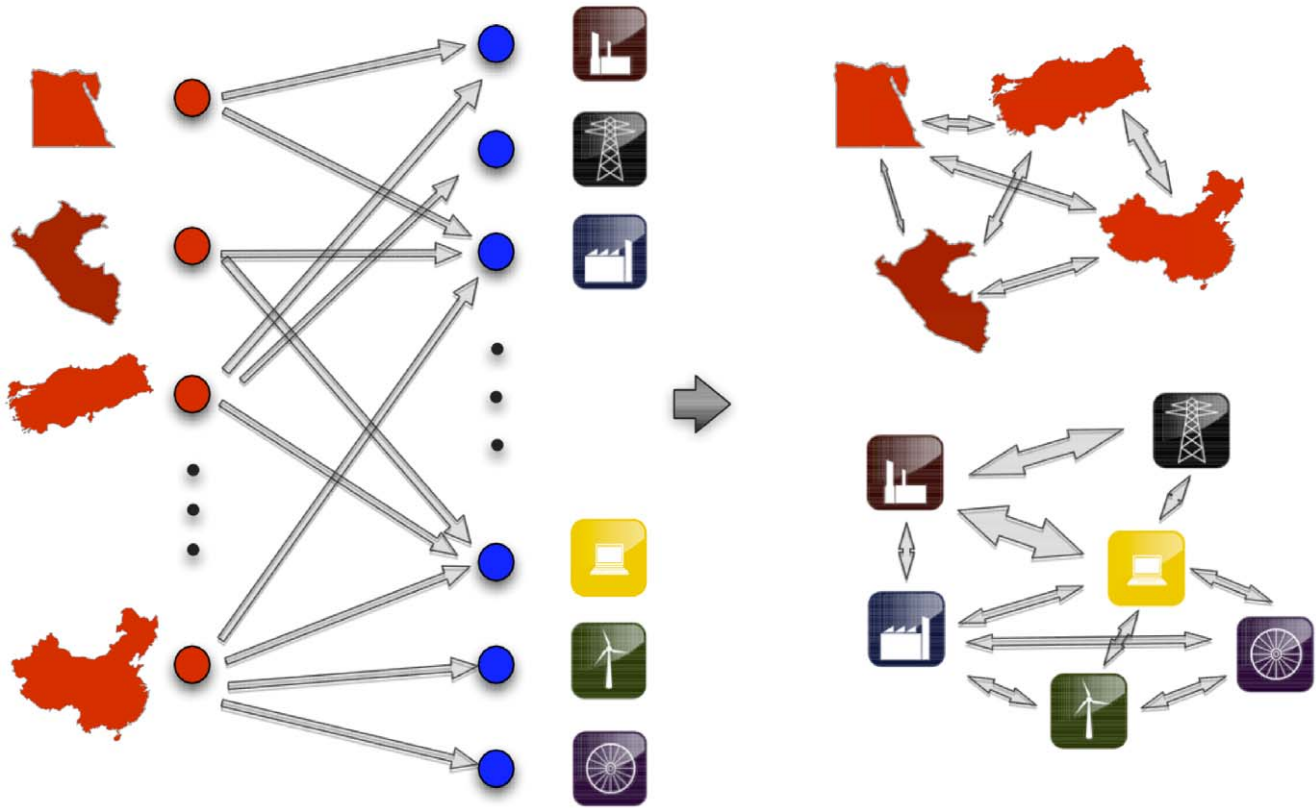

**Figure 1. The network of countries and products and the two possible projections.**

doi:10.1371/journal.pone.0047278.g001

ical neighbors. This features despite its high frequency in most geographical areas, comes unexpected since it is not the most rationale choice [26,27]: as an example, both banks [28] and countries [29] trade preferentially with similar partners, thereby affecting the whole robustness of the system [30,31]. This behavior can be reproduced by simple statistical models based on agents' fitnesses [32,33].

**The Network of Products**

Similarly to countries, we can project the bipartite graph into a product network by connecting two products if they are produced by the same one or more countries and giving a weight to this link proportional to the number of countries producing both products. Such network can be represented by the  $(N_P \times N_P)$  product-product matrix  $\hat{P} = \hat{M}^T \hat{M}$ . The non-diagonal elements  $P_{pp'}$  correspond to the number of countries producing both  $p$  and  $p'$  have in common, while the diagonal elements  $P_{pp}$  corresponds to the number of countries producing  $p$ .

In analogy with Eq. (3), the similarity matrix among products is defined as

$$S_{pp'}^P = 2 \frac{P_{pp'}}{P_{pp} + P_{p'p'}} \tag{4}$$

It indicates how much products are correlated on a market: a value  $S_{pp'}^P = 1$  indicates that whenever product  $p$  is present on the market of a country, also product  $p'$  would be present. This could be for example the case of two products  $p, p'$  that are both necessary for the same and only industrial process.

As in the case of countries, the MSF algorithm can be applied to visualize correlations and detect communities. In the case of the product network this analysis brings to an apparently contradictory results: let's see why. Products are officially characterized by a hierarchical topology assigned by UN. Within this classification similar issue as "metalliferous ores and metal scraps" (groups 27.xx) are in a totally different section with respect to "non ferrous metals" (groups 68.xx). By applying our new algorithm, based on the economical competition network  $\hat{M}$ , one would naively expect that products belonging to the same UN hierarchy should belong to the same community and *vice-versa*; therefore, if we would assign different colors to different UN hierarchies, one would expect all the nodes belonging to a single community to be of the same color. In Fig. 3 we show that this is not the case. Such a paradox can be understood by analyzing in closer detail the detected communities with the MSF method. As an example, we show in Fig. 4 a large community where most of the vertices belong to the area of "vehicle part and constituents". In this cluster we can spot the noticeable presence of a vertex belonging to "food" hierarchy. This apparent contradiction is solved up by noticing that such vertex refers to colza seeds, a typical plant recently used mostly for bio-fuels and not for alimentation: our MSF method has correctly positioned this "food" product in the "vehicle" cluster. Therefore, methods based on community detection could be considered as a possible rational substitute for current top-down "human-made" taxonomies [32].

**Ranking Countries and Products by Reflection Method**

Hidalgo and Haussman (HH) have introduced in [13,14] the fundamental idea that the complex set of capabilities of countries (in general hardly comparable between different countries) can be

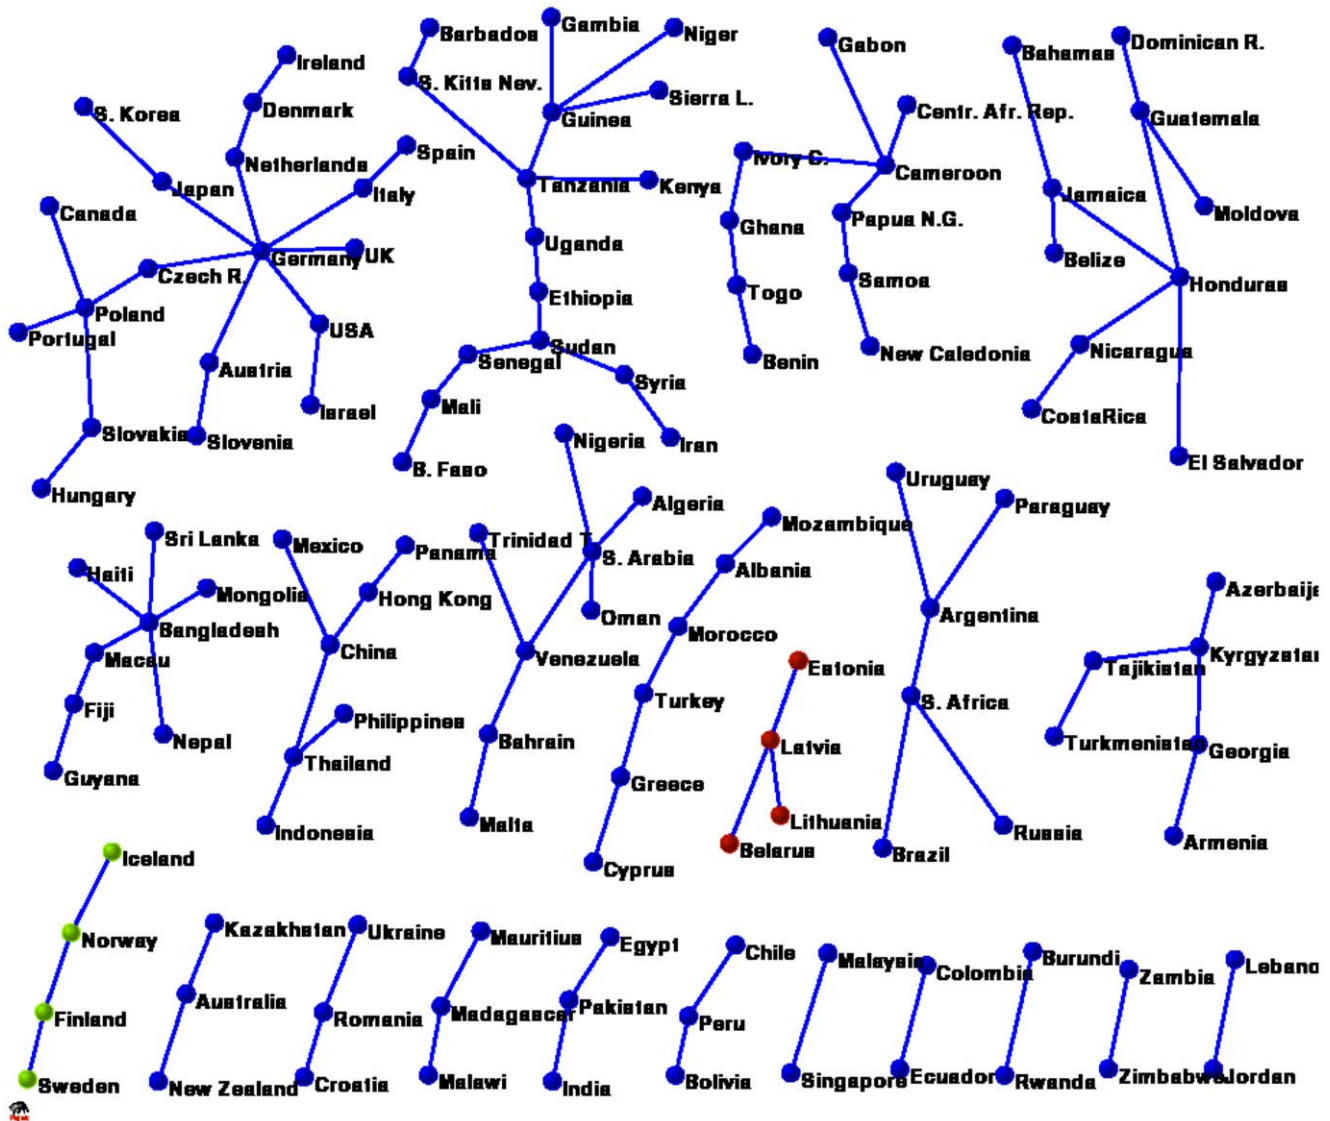

**Figure 2. The Minimal Spanning Forest for the Countries.** The various subgraphs have a distinct geographical similarity. We show in green northern European countries and in red the “Baltic” republics. In general neighboring (also in a social and cultural sense) countries compete for the production of similar goods. doi:10.1371/journal.pone.0047278.g002

inferred from the structure of matrix  $\hat{M}$  (that we can observe). In this spirit, ubiquitous products require few capabilities and can be produced by most countries, while diversified countries possess many capabilities allowing to produce most products. Therefore, the most diversified countries are expected to be amongst the top ones in the global competition; on the same footing ubiquitous products are likely to correspond to low-quality products.

In order to refine such intuitions in a quantitative ranking among countries and products, the authors of [13,14] have introduced two quantities: the  $n^{th}$  level diversification  $d_c^{(n)}$  (called  $k_{c,n}$  in [13,14]) of the country  $c$  and the  $n^{th}$  level ubiquity  $u_p^{(n)}$  (called  $k_{p,n}$  in [13,14]) of the product  $p$ . At the zero<sup>th</sup> order the diversification of a country is simply defined as the number of its products or

$$d_c^{(0)} = \sum_{p=1}^{N_p} M_{cp} \equiv k_c \tag{5}$$

where  $k_c$  is the degree of the node  $c$  in the bipartite country-product network); analogously the zero<sup>th</sup> order ubiquity of a product is defined as the number of different countries producing it

$$u_p^{(0)} = \sum_{c=1}^{N_c} M_{cp} \equiv k_p \tag{6}$$

where  $k_p$  is the degree of the node  $p$  in the bipartite country-product network. The diversification  $k_c$  is intended to represent the zero<sup>th</sup> order measure of the “quality” of the country  $c$  with the idea that the more products a country exports the strongest its position on the market. The ubiquity  $k_p$  is intended to represent the zero<sup>th</sup> order measure of the “dis-value of the product  $p$  in the global competition with the idea that the more countries produce a product, the least is its value on the market.



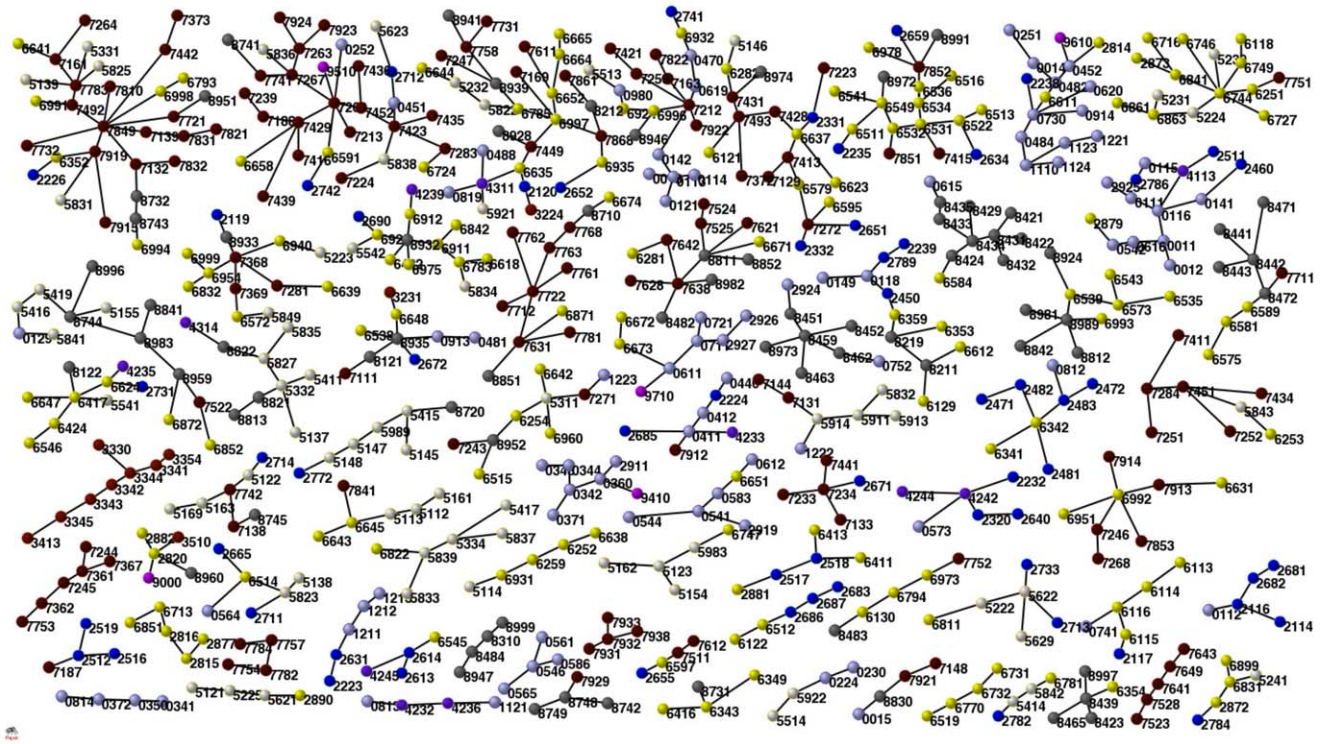

**Figure 3. The Minimal Spanning Forest (MSF) for the Products.** We put a different color according to the first digit used in COMTRADE classification. This analysis should reveal correlation between different but similar products. doi:10.1371/journal.pone.0047278.g003

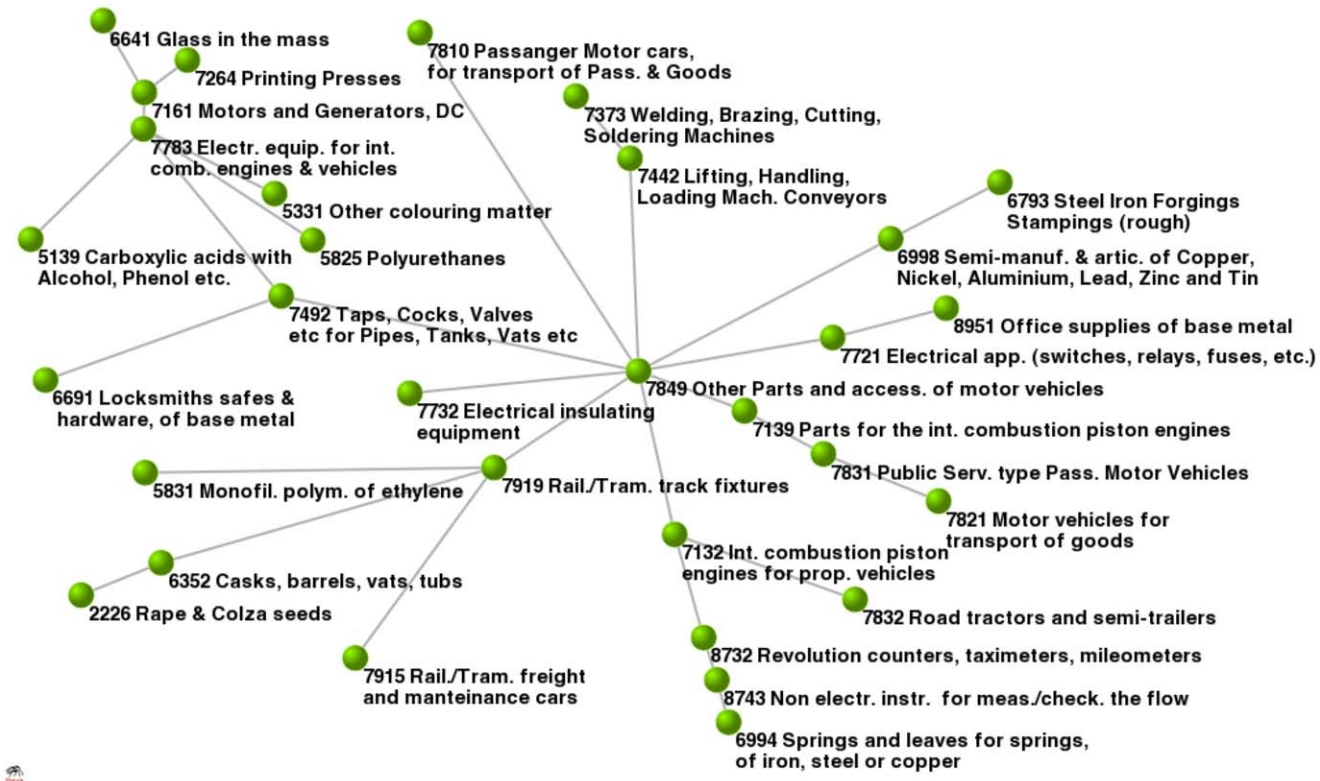

**Figure 4. The largest tree in the Products MSF.** When passing from classification colors to the real products name, we see they are all strongly related. It is interesting the presence of colza seeds in the lower left corner of the figure. doi:10.1371/journal.pone.0047278.g004

In the original approach these two initial quantities are refined in an iterative way via the so-called “reflections method”, consisting in defining the diversification of a country at the  $(n + 1)^{th}$  iteration as the average ubiquity of its product at the  $n^{th}$  iteration and the ubiquity of a country at the  $(n + 1)^{th}$  iteration as the average diversification of its producing countries at the  $n^{th}$  iteration:

$$\begin{cases} d_c^{(n+1)} = \frac{1}{k_c} \sum_{p=1}^{N_p} M_{cp} u_p^{(n)} \\ u_p^{(n+1)} = \frac{1}{k_p} \sum_{c=1}^{N_c} M_{cp} d_c^{(n)} \end{cases} \quad (7)$$

In vectorial form, this can be cast in the following form

$$\begin{cases} d^{(n)} = \hat{J}_A u^{(n-1)} \\ u^{(n)} = \hat{J}_B d^{(n-1)} \end{cases} \quad (8)$$

where  $d^{(n)}$  is the  $N_c -$  dimensional vector of components  $d_c^{(n)}$ ,  $u^{(n)}$  is the  $N_p -$  dimensional vector of components  $u_p^{(n)}$ , and where we have called  $\hat{J}_A = \hat{C}\hat{M}$  and  $\hat{J}_B = \hat{P}\hat{M}^t$  (the upper suffix  $t$  stands for “transpose”), with  $\hat{C}$  and  $\hat{P}$  respectively the  $N_c \times N_c$  and  $N_p \times N_p$  square diagonal matrices defined by  $C_{cc'} = k_c^{-1} \delta_{cc'}$  and  $P_{pp'} = k_p^{-1} \delta_{pp'}$ .

Such an approach suffers from some problems. The first one is related to the fact that the process is defined in a bipartite networks and therefore even and odd iterations have different meanings. In fact, let us consider the diversification  $d_c^{(1)}$  of the  $c^{th}$  country: as prescribed by the algorithm,  $d_c^{(1)}$  is the average ubiquity of the products of the  $c^{th}$  country at the 0-th iteration. Therefore countries with most ubiquitous (less valuable) products would get an highest 1<sup>st</sup> order diversification. On the other hand, the approximately triangular structure of  $\hat{M}$  tells us that these countries are the same ones with a small degree and therefore with a low value of the 0 - th order diversification  $d^{(0)}$ . As shown to by [13,14], this is the case also to higher orders; therefore the diversifications at even and odd iterations are substantially an anti-correlated. Conversely, successive even iterations are positively correlated so that  $d_c^{(2)}$  looks a refinement of  $d_c^{(0)}$ ,  $d_c^{(4)}$  a refinement of  $d_c^{(2)}$  and so on. Same considerations apply to the iterations for the ubiquity of products.

The major problem in the HH algorithm is that it is a case of a consensus dynamics [34], i.e. the state of a node at iteration  $t$  is just the average of the state of its neighbors at iteration  $t - 1$ . It is well known that such iterations have the uniform state (all the nodes equal) as the natural fixpoint. It is therefore puzzling how such “equalizing” procedure could lead to any form of ranking. To solve such a puzzle, let’s write the HH algorithm as a simple iterative linear system and analyze its behavior.

Focusing only on even iterations and on diversifications, we can write HH procedure as:

$$d^{(2n)} = \hat{J}_A \hat{J}_B d^{(2n-2)} = (\hat{J}_A \hat{J}_B)^n d^{(0)} = \hat{H}^n d^{(0)}, \quad (9)$$

where  $\hat{H} = \hat{J}_A \hat{J}_B = \hat{C} \hat{M} \hat{P} \hat{M}^t$  is a  $N_c \times N_c$  squared matrix.

The matrix  $\hat{H}$  in Eq.9 is a Markovian stochastic matrix when it acts from the right on positive vectors, in the sense that every element

$H_{cc'} \geq 0$  and

$$\sum_{c=1}^{N_c} H_{cc'} = 1.$$

In particular for the given  $\hat{M}$  adjacency matrix it is also ergodic. Therefore, its spectrum of eigenvalues is bounded in absolute value by its unique upper eigenvalue  $\lambda_1 = 1$ . Since  $\hat{H}$  acts on  $d^{(2n-2)}$  from the left, the right eigenvector  $e_1$  corresponding to the largest eigenvalue  $\lambda_1 = 1$  is simply a uniform vector with identical components, i.e. in the  $n \rightarrow \infty$  limit  $d^{(2n)}$  converges to the fixpoint  $e_1$  where all countries have the same asymptotic diversification.

It is therefore not a case that HH prescribe to stop their algorithm at a finite number of iterations and that they introduce as a recipe to consider as the ranking of a country the rescaled version of the  $2n^{th}$  level diversifications [14]

$$\tilde{d}_c^{(2n)} = \frac{d_c^{(2n)} - \overline{d^{(2n)}}}{\sigma_d^{(2n)}}, \quad (10)$$

where  $\overline{d^{(2n)}}$  is the arithmetic mean of all  $d_c^{(2n)}$  and  $\sigma_d^{(2n)}$  the standard deviation of the same set. With these prescription, HH algorithm seems to converge to an approximately constant value after  $\sim 16$  steps.

This observed behavior can be easily be explained by noticing that, in contrast with the erroneous statement in [14], finding the fitness by the reflection method can be reformulated as a fix-point problem (our Eq. 9) and solved using the spectral properties of a linear system. In fact, since the ergodic Markovian nature of  $\hat{H}$  we can order eigenvalues/eigenvectors such that  $|\lambda_{N_c}| \leq |\lambda_{N_c-1}| \leq \dots \leq |\lambda_2| < \lambda_1 = 1$ . Therefore, expanding  $d^{(0)}$  in terms of the right eigenvectors  $\{e_1, e_2, \dots, e_{N_c}\}$  of  $\hat{H}$  the initial condition

$$d^{(0)} = a_1 e_1 + a_2 e_2 + \dots + a_{N_c} e_{N_c},$$

we can write the  $2n$ -th iterate as

$$\begin{aligned} d^{(2n)} &= a_1 e_1 + a_2 \lambda_2^{2n} e_2 + \dots + a_{N_c} \lambda_{N_c}^{2n} e_{N_c} \\ &= a_1 e_1 + a_2 \lambda_2^{2n} e_2 + O((\lambda_3/\lambda_2)^{2n}). \end{aligned} \quad (11)$$

Therefore, at sufficiently large  $n$  the ordering of the countries is completely determined by the components of  $e_2$ ; notice that such an asymptotic ordering is independent from the initial condition  $d^{(0)}$  and therefore should be considered as the appropriate fixpoint renormalized fitness  $d^*$  for all countries.

What happens to the HH scheme? At sufficiently large  $n$ ,  $\langle d^{(2n)} \rangle \approx a e_1$  and  $\sigma_{d^{(2n)}} \propto a_2 \lambda_2^{2n} e_2 + O((\lambda_3/\lambda_2)^{2n})$ ; therefore  $d^{(2n)}$  becomes proportional to  $e_2$  (Eq. 10). The number of iterations  $it$  needed to converge is given by the ratio between  $\lambda_2$  and  $\lambda_3$   $((\lambda_3/\lambda_2)^{it} \ll 1)$ ; therefore the  $it \sim 16$  iterations prescribed by HH are not a general prescription but depend on the spectrum of the network analyzed.

Notice also that when the numerical reflection method is used, the renormalized fitness represents a deviation  $O(\lambda_2^n)$  from a constant and can be detected only if it is bigger than the numerical error; therefore only “not too big”  $it$  can be employed. On the other hand, the spectral characterization we propose does not suffer from such a pitfall even when. Similar considerations can be

developed for the even iterations of the reflection method for the products.

### Biased Markov Chain Approach and Non-linear Interactions

Having assessed the problems of HH's method, we investigate the possibility of defining alternative linear algorithms able to implement similar economical intuitions about the ranking of the countries while keeping a more robust mathematical foundation. In formulating such a new scheme we will keep the approximation of linearity for the iterations even though we shall find in the results hints of the non-linear nature of the problem.

Our approach is inspired to the well-known PageRank algorithm [35]. PageRank (named after the WWW, where vertices are the pages) is one of the most famous of Bonacich centrality measures [36]. In the original PageRank method the ranking of a vertex is proportional to the time spent on it by an unbiased random walker (in different contexts [11] analogous measures assess the stability of a firm in a business firm network).

We define the weights of vertices to be proportional to the time that an *appropriately biased* random walker on the network spends on them in the large time limit [37]. As shown below, such weights, being the generalization of  $k_c$  and  $k_p$ , give a measure respectively of competitiveness of countries and "dis-quality" (or lack of competitiveness) of products. As the nodes of our bipartite network are entities that are logically and conceptually separated (countries and products), we assign to the random walker a different bias when jumping from countries to products respect to jumping from products to countries.

Let us call  $w_c^{(n)}$  weight of country  $c$  at the  $n^{th}$  iteration and  $w_p^{(n)}$  fitness of product  $p$  at the  $n^{th}$  iteration. We define the following Markov process on the country-product bipartite network

$$\begin{cases} w_c^{(n+1)}(\alpha, \beta) = \sum_{p=1}^{N_p} G_{cp}(\beta) w_p^{(n)}(\alpha, \beta) \\ w_p^{(n+1)}(\alpha, \beta) = \sum_{c=1}^{N_c} G_{pc}(\alpha) w_c^{(n)}(\alpha, \beta) \end{cases} \quad (12)$$

where the Markov transition matrix  $\hat{G}$  is given by

$$\begin{cases} G_{cp}(\beta) = \frac{M_{cp} k_c^{-\beta}}{\sum_{c'=1}^{N_c} M_{c'p} k_{c'}^{-\beta}} \\ G_{pc}(\alpha) = \frac{M_{cp} k_p^{-\alpha}}{\sum_{p'=1}^{N_p} M_{cp'} k_{p'}^{-\alpha}} \end{cases} \quad (13)$$

Here  $G_{cp}$  gives the probability to jump from product  $p$  to country  $c$  in a single step, and  $G_{pc}$  the probability to jump from country  $c$  to product  $p$  also in a single step. Note that Eqs.(13) define a  $(N_c + N_p)$ -dimensional connected Markov chain of period two. Therefore, random walkers initially starting from countries, will be found on products at odd steps and on countries at even ones; the reverse happens for random walkers starting from products. By considering separately the random walkers starting from countries and from products, we can reduce this Markov chain to two ergodic Markov chains of respective dimension  $N_c$  and  $N_p$ . In particular, if the walker starts from a country, using a vectorial formalism, we can write for the weights of countries

$$w_c^{(n+1)}(\alpha, \beta) = \hat{T}(\alpha, \beta) w_c^{(n)}(\alpha, \beta) \quad (14)$$

where the  $N_c \times N_c$  ergodic stochastic matrix  $\hat{T}$  is defined by

$$T_{cc'}(\alpha, \beta) = \sum_{p=1}^{N_p} G_{cp}(\beta) G_{pc'}(\alpha). \quad (15)$$

At the same time for products we can write

$$w_p^{(n+1)}(\alpha, \beta) = \hat{S}(\alpha, \beta) w_p^{(n)}(\alpha, \beta), \quad (16)$$

where the  $N_p \times N_p$  ergodic stochastic matrix  $\hat{S}$  is given by

$$S_{pp'}(\alpha, \beta) = \sum_{c=1}^{N_c} G_{pc}(\alpha) G_{cp'}(\beta). \quad (17)$$

Given the structure of  $\hat{T}$  and  $\hat{S}$ , it is simple to show that the two matrices share the same spectrum which is upper bounded in modulus by the unique eigenvalue  $\mu_1 = 1$ . For both matrices, the eigenvectors corresponding to  $\mu_1$  are the stationary and asymptotic weights  $\{w_c^*(\alpha, \beta)\}$  and  $\{w_p^*(\alpha, \beta)\}$  of the Markov chains. In order to find analytically such asymptotic values, we apply the detailed balance condition:

$$G_{pc} w_c^* = G_{cp} w_p^* \quad \forall (c, p) \quad (18)$$

which gives

$$\begin{cases} w_c^* = A \left( \sum_{p=1}^{N_p} M_{cp} k_p^{-\alpha} \right) k_c^{-\beta} \\ w_p^* = B \left( \sum_{c=1}^{N_c} M_{cp} k_c^{-\beta} \right) k_p^{-\alpha} \end{cases} \quad (19)$$

where  $A$  and  $B$  are normalization constants. Note that for  $\alpha = \beta = 0$  Eq. (13) gives the completely unbiased random walk for which  $\hat{T} = \hat{H}'$  where  $\hat{H}$  is given in Eq. (9). Therefore, in this case Eqs. (19) become

$$\begin{cases} w_c^*(0, 0) \sim k_c \\ w_p^*(0, 0) \sim k_p, \end{cases} \quad (20)$$

as for the case of unbiased random walks on a simple connected network the asymptotic weight of a node is proportional to its connectivity. Thus, in the case of  $\alpha = \beta = 0$  we recover the zero<sup>th</sup> order iteration of the HH's reflection method. Note that, in the same spirit of HH,  $w_c^*(0, 0)$  gives a rough measure of the competitiveness of country  $c$  while  $w_p^*$  gives an approximate measure of the dis-quality in the market of product  $p$ . By continuity, we associate the same meaning of competitiveness/disquality to the stationary states  $w_c^*/w_p^*(0, 0)$  at different values of  $\alpha$  and  $\beta$ .

To understand the behavior of our ranking respect to the bias, we have analyzed the mean correlation (square of the Pearson coefficient) for the year 1998 (other years give analogous results)

between the logarithm of the GDP of each country and its weight (Eqs. (19) for different values of  $\alpha$  and  $\beta$  (see Fig. 5). We are aware that GDP is not an absolute measure of wealth [38] as it does not account directly for relevant quantities like the wealth due to natural resources [39]. Nevertheless, we expect GDP to monotonically increase with the wealth. What network analysis shows is that the number of products is correlated with both quantities. We envisage such kind of analysis in order to define suitable policies for underdeveloped countries [40].

It is interesting to note that the region of large correlations (region inside the contour plot in the Fig. 5) is found in the positive quadrant for about  $0.2 < \alpha < 1.8$  and  $0.5 < \beta < 1$ ; in particular the maximal value is approximately at  $\alpha \simeq 1.1$  and  $\beta \simeq 0.8$ . These results can be connected with the approximately “triangular” shape of the matrix  $\hat{M}$ . In fact, let us rewrite Eqs. (19) (apart from the normalization constant) as:

$$\begin{cases} w_c^* \sim k_c^{1-\beta} \langle k_p^{-\alpha} \rangle_c \\ w_p^* \sim k_p^{1-\alpha} \langle k_c^{-\beta} \rangle_p \end{cases},$$

where  $\langle k_p^{-\alpha} \rangle_c$  is the arithmetic average of  $k_p^{-\alpha}$  of the products exported by country  $c$  and  $\langle k_c^{-\beta} \rangle_p$  is the arithmetic average of  $k_c^{-\beta}$  for countries exporting product  $p$ . Since  $\beta$  is substantially positive and slightly smaller of 1 and  $\alpha$  is definitely positive with optimal values around 1, the competitive countries will be characterized by a good balance between a high value of  $k_c$  and a small typical value of  $k_p$  of its products. Nevertheless, since the optimal values of  $\alpha$  are distributed up to the region of values much larger than 1 (i.e.  $1-\beta$  is significantly smaller than 1), we see that the major role for the asymptotic weight of a country is played by the presence in its portfolio of un-ubiquitous products which alone give the dominant contribution to  $w_c^*$ . A similar reasoning leads to the conclusion that the dis-value of a product is basically

determined by the presence in the set of its producers of poorly diversified countries that are basically exporting only products characterized by a low level of complexity.

Our new approach based on biased Markov chain theory permits thus to implement the interesting ideas developed by HH in [14] on a more solid mathematical basis using the framework of linear iterated transformations and avoiding the indicated flaws of HH’s “reflection method”. Interestingly, our results reveal a strongly non-linear entanglement between the two basic information one can extract from the matrix  $\hat{M}$ : diversification of countries and ubiquity of products. In particular, this non-linear relation makes explicit an almost extremal influence of ubiquity of products on the competitiveness of a country in the global market: having “good” or complex products in the portfolio is more important than to have many products of poor value. Furthermore, the information that a product has among its producers some poorly diversified countries is nearly sufficient to say that it is a non-complex (dis-valuable) product in the market. This strongly non-linear entanglement between diversifications of countries and ubiquities of products is an indication of the necessity to go beyond the linear approach in order to introduce more sound and direct description of the competition of countries and products possibly based on a suitable *ab initio* non-linear approach characterized by a smaller number of *ad hoc* assumptions [41].

### Discussion

In this paper we applied methods of graph theory to the analysis of the economic productions of countries. The information is available in the form of an  $N_c \times N_p$  rectangular matrix  $\hat{M}$  giving the different production of the possible  $N_p$  goods for each of the  $N_c$  countries. The matrix  $\hat{M}$  corresponds to a bipartite graph, the country-product network, that can be projected into the country-country network  $\hat{C}$  and the product-product network  $\hat{P}$ . By using complex-networks analysis, we can attain an effective filtering of the information contained in  $\hat{C}$  and  $\hat{P}$ . We introduce a new

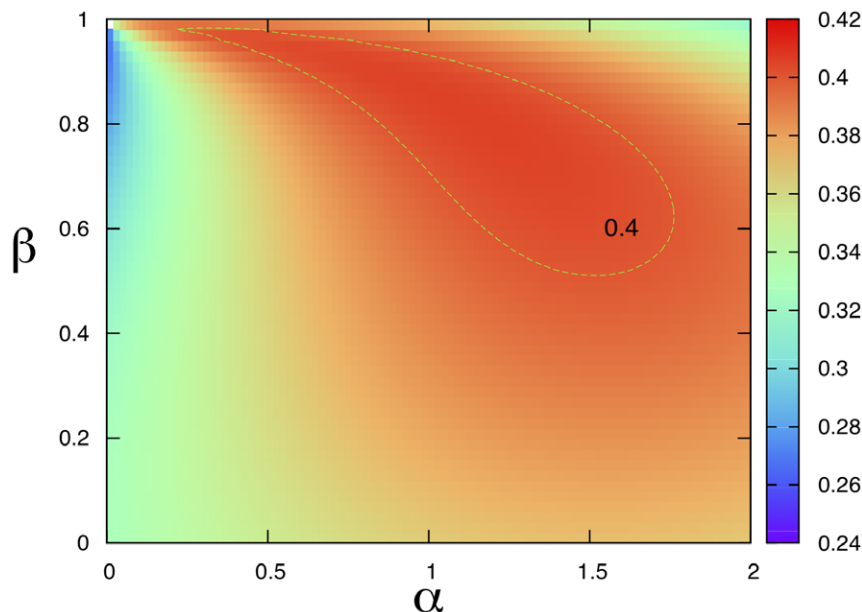

**Figure 5. The plot of the mean Correlation (square of Pearson coefficient,  $R_2$ ) between logarithm of GDP and fixpoint weights of countries in the biased (Markovian) random walk method as a function of parameters  $\alpha$  and  $\beta$ . The contour plot for a level of  $R_2=0.4$  is indicated as a green loop in the orange region (year = 1998). doi:10.1371/journal.pone.0047278.g005**



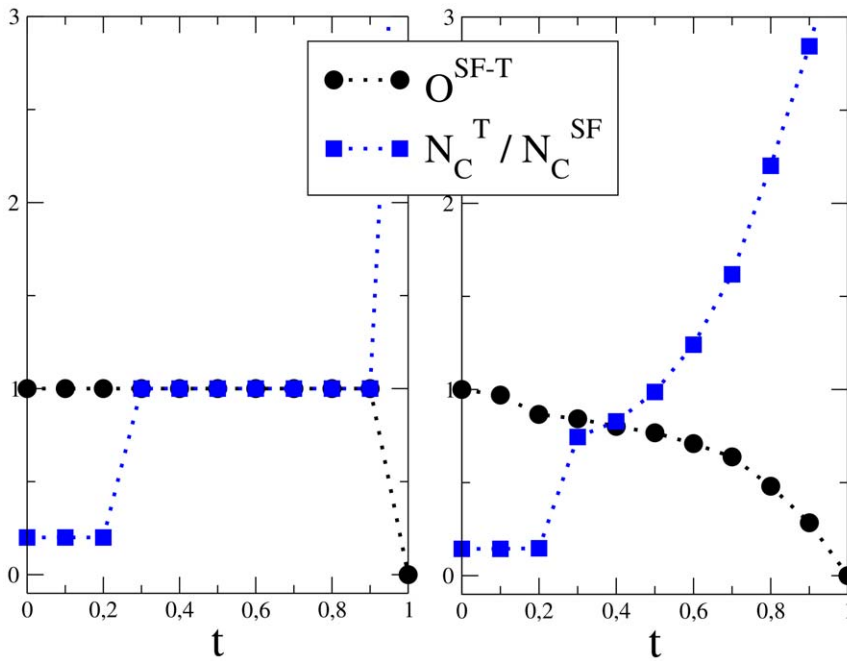

**Figure 6. Graphs of the overlap  $O^{SF-T}$  between the spanning forest and threshold graph and the ratio  $N_C^T(t)/N_C^{SF}$  versus the threshold  $t$ .** Here  $N_C^T$  is the number of clusters in the threshold graph and  $N_C^{SF}$  is the number of clusters in the spanning forest. (left panel:) Curves for  $G_C(N_P, n)$ . In this deterministic case,  $N_C^{SF}$  equals the number of communities and both curves intersect when the  $N_C^{SF} = N_C^T$ . (right panel:) Curves for  $G_C^{nd}(N_P, n)$ ; curves are averaged over 100 configurations of the noise. doi:10.1371/journal.pone.0047278.g006

filtering algorithm that identifies communities of countries with similar production. As an unexpected result, this analysis shows that neighboring countries tend to compete over the same markets instead of diversifying. We also show that a classification of goods based on such filtering provides an alternative product taxonomy determined by the countries' activity. We then study the ranking of the countries induced by the country-product bipartite network. We first show that HH's ranking is the fix-point of a linear process; in this way we can avoid some logical and numerical pitfalls and clarify some of its weak theoretical points. Finally, in analogy with the Google PageRank algorithm, we define a biased, two parameters Markov chain algorithm to assign ranking weights to countries and products by taking into account the structure of the adjacency matrix of the country-product bipartite network. By correlating the fix-point ranking (i.e. competitiveness of countries and products) with the GDP of each country, we find that the optimal bias parameters of the algorithm indicate a strongly non-linear interaction between the diversification of the countries and the ubiquity of the products. The fact that we still find some discrepancies between fitnesses and GDP is related to the fact that they measure related but different things. In particular while GDP is a measure of the richness of a country, the fitness measures the possibility of a certain country to sustain its growth or to recover from crises.

**Materials and Methods**

**Graphs**

A graph is a couple  $G=(V,E)$  where  $V = \{v_i | i = 1 \dots n_A\}$  is the set of vertices, and  $E \subseteq V \times V$  is the set of edges. A graph  $G$  can be represented via its adjacency matrix  $A$ .

$$A_{ij} = \begin{cases} 1 & \text{if an edge exists between } v_i \text{ and } v_j \\ 0 & \text{otherwise.} \end{cases} \quad (21)$$

The degree  $k_i$  of the node  $v_i$  is the number  $\sum_j A_{ij}$  of its neighbors.

An unbiased random walk on a graph  $G$  is characterized by a probability  $p_{ij} = 1/k_i$  of jumping from a vertex  $v_i$  to one of its  $k_i$  neighbors and is described by the jump matrix

$$J_G = K^{-1}A, \quad (22)$$

**Table 1.** Example of estimates of the number of communities for the noisy case; notice that  $N_C^*$  is close to the expected value  $N_P$ .

| $N_P$ | $n$ | $N_C^{SF}$ | $N_C^*$ |
|-------|-----|------------|---------|
| 10    | 5   | 14         | 11.1    |
| 9     | 5   | 13         | 10.1    |
| 7     | 5   | 9          | 7.2     |
| 5     | 10  | 12         | 6.2     |
| 5     | 7   | 8          | 6.5     |
| 5     | 5   | 7          | 5.3     |

Intersection point between  $O^{SF-T}(t)$  and  $r(t)$  are calculated averaging curves over 100 random samples. doi:10.1371/journal.pone.0047278.t001

where  $K$  is the diagonal matrix  $K_{ij} = k_i \delta_{ij}$  corresponding to the nodes degrees.

### Bipartite Graphs

A bipartite graph is a triple  $G = (A, B, E)$  where  $A = \{a_i | i = 1 \dots n_A\}$  and  $B = \{b_j | j = 1 \dots n_B\}$  are two disjoint sets of vertices, and  $E \subseteq A \times B$  is the set of edges, i.e. edges exist only between vertices of the two different sets  $A$  and  $B$ .

The bipartite graph  $G$  can be described by the matrix  $\hat{M}$  defined as

$$M_{ij} = \begin{cases} 1 & \text{if an edge exists between } a_i \text{ and } b_j \\ 0 & \text{otherwise.} \end{cases} \quad (23)$$

In terms of  $\hat{M}$ , it is possible to define the adjacency matrix  $A$  of  $G$  as

$$A = \begin{bmatrix} 0 & M \\ M^T & 0 \end{bmatrix} \quad (24)$$

It is also useful to define the co-occurrence matrices  $P^A = MM^T$  and  $P^B = M^T M$  that respectively count the number of common neighbors between two vertices of  $A$  or of  $B$ .  $P^A$  is the weighted adjacency matrix of the co-occurrence graph  $C^A$  with vertices on  $A$  and where each non-zero element of  $P^A$  corresponds to an edge among vertices  $a_i$  and  $a_j$  with weight  $P^A_{ij}$ . The same is valid for the co-occurrence matrix  $P^B$  and the co-occurrence graph  $C^B$ .

Many projection schemes for a bipartite graph  $G$  start from constructing the graphs  $C^A$  or  $C^B$  and eliminating the edges whose weights are less than a given threshold or whose statistical significance is low.

### Matrix from RCA

To make a fair comparison between the exports, it is useful to employ Balassa's Revealed Comparative Advantage (RCA) [15] i.e. the ratio between the export share of product  $p$  in country  $c$  and the share of product  $p$  in the world market

$$RCA_{cp} = \frac{X_{cp}}{\sum_{p'} X_{cp'}} / \frac{\sum_{c'} X_{c'p}}{\sum_{c', p'} X_{c'p'}} \quad (25)$$

where  $X_{cp}$  represents the dollar exports of country  $c$  in product  $p$ .

The network structure is given by the country-product adjacency matrix  $\hat{M}$  defined as

$$M_{cp} = \begin{cases} 1 & \text{if } RCA_{cp} > R^* \\ 0 & \text{if } RCA_{cp} < R^* \end{cases} \quad (26)$$

### References

1. Caldarelli G (2007) Scale-Free Networks: Complex Webs in Nature and Technology. Oxford University Press.
2. Battiston S, Delli Gatti D, Gallegati M, Greenwald B, Stiglitz JE (2007) Credit chains and bankruptcy propagation in production networks. Journal of Economic Dynamics and Control 31: 2061–2084.
3. Gabrielli A, Caldarelli G (2007) Invasion percolation and critical transient in the Barabási model of human dynamics. Physical Review Letters 98: 208701.

where  $R^*$  is the threshold. A positive entry,  $M_{cp} = 1$  tells us that country  $c$  is a competitive exporter of the product  $p$ .

### Minimal Spanning Forest

The spanning forest algorithm (SFA) is a computationally less-demanding variant of the Spanning Tree Algorithm (STA) where single operations can take up to  $\mathcal{O}(\log|V|)$  respect to the STA case where all operations are  $\mathcal{O}(1)$ . Here cluster is a synonymous for connected component.

To analyze the performance of the SFA, we use as a benchmark a weighted network with well defined communities. We consider the graph  $G_C(N_P, n)$  composed joining  $N_P$  communities each consisting in a clique of  $n$  nodes; the total number of nodes is  $N_G = n \cdot N_P$ . A function  $f : \{1 \dots N_G\} \rightarrow \{1 \dots N_P\}$  associates to each node  $i$  its community  $f_i$ ; links between nodes  $i$  and  $j$  have weight  $w_{ij} = 2^{-|f_i - f_j|}$ . Thus, links inside a community have weight one, while links among separate communities have smaller weights. We also consider the extremely noisy case  $G_C^{rnd}(N_P, n)$  where weights between nodes  $i$  and  $j$  are random variables uniformly distributed in the interval  $[0, 2^{-|f_i - f_j|}]$ .

Furthermore we shall also consider for a weighted graph  $G = (V, E, W)$  the associate threshold graph  $T(G, t) = (V, E')$  where  $E'$  is the subset of edges in  $E$  having weight higher than the threshold  $t$ . The threshold graph  $T(G_C(N_P, n), 1 - \epsilon)$  corresponds to the separated  $N_P$  communities for  $\epsilon < 2^{-N_P}$ .

Finally, to compare the minimum spanning forest  $MSF(G)$  with a threshold graph  $T(G, t)$ , we consider the overlap  $O^{SF-T}$  to be the fraction of links in  $MSF(G)$  that belong to the same cluster of  $T(G, t)$ .

In the non-random case, the SFA individuates correctly the communities and  $N_P$  equals the number of clusters  $N_C^{SF}$  of  $MSF(G_C(N_P, n))$ . Notice that the ratio  $r(t) = N_C^T(t) / N_C^{SF}$  between the number of clusters  $N_C^T(t)$  of  $T(G_C(N_P, n), t)$  versus the threshold  $t$  intersects the overlap  $O^{SF-T}$  when  $N_C^T = N_P$  is the correct number of communities. The left panel of Fig. 6 shows such behavior for  $N_P = n = 5$ .

In the noisy case, we find that  $N_C^{SF}$  overestimates  $N_P$ ; on the other hand,  $r(t)$  intersect  $O^{SF-T}(t)$  at  $t = t^*$  for values  $r(t^*)$  less than one and  $N_C^* = r(t^*) \cdot N_C^{SF}$  gives a better estimate of  $N_P$ . Such an effect is shown in Table 1 that shows for several values of  $N_P, n$  the proximity of  $N_C^*$  to the expected number of communities  $N_P$ . The right panel of fig. 6 shows the intersection of curves for  $N_P = n = 5$  in the noisy case.

### Acknowledgments

We thank EU FET Open project FOC nr.255987 and CNR-PNR National Project "Crisis-Lab" for support.

### Author Contributions

Analyzed the data: GC MC AG LP AS AT. Contributed reagents/materials/analysis tools: GC MC AG LP AS AT. Wrote the paper: GC MC AG LP AS AT.

8. Stanley HE, Amaral LAN, Buldyrev SV, Gopikrishnan P, Plerou V, et al. (2002) Self-organized complexity in economics and finance. *Proceedings of the National Academy of Sciences of the United States of America* 99: 2561–2565.
9. MA S, Boguñá M (2003) Topology of the world trade web. *Phys Rev E* 68: 15101.
10. Schweitzer F, Fagiolo G, Sornette D, Vega-Redondo F, Vespignani A, et al. (2009) Economic Networks: The New Challenges. *Science* 325: 422–425.
11. Fu D, Pammolli F, Buldyrev SV, Riccaboni M, Matia K, et al. (2005) The growth of business firms: Theoretical framework and empirical evidence. *Proceedings of the National Academy of Sciences of the United States of America* 102: 18801–18806.
12. Majumder SR, Diermeier D, Rietz TA, Amaral LA (2009) Price dynamics in political prediction markets. *Proceedings of the National Academy of Sciences* 106: 679–684.
13. Hidalgo CA, Klinger B, Barabási AL, Hausmann R (2007) The Product Space Conditions the Development of Nations. *Science* 317: 482–487.
14. Hidalgo CA, Hausmann R (2009) The building blocks of economic complexity. *Proceedings of the National Academy of Sciences* 106: 10570–10575.
15. Balassa B (1965) Trade liberalization and 'revealed' comparative advantage. *Manchester School* 33: 99–123.
16. Bellman R (1997) *Introduction to matrix analysis* (2nd ed.). Philadelphia, PA, USA: Society for Industrial and Applied Mathematics.
17. Johnson N, Lux T (2011) Financial systems: Ecology and economics. *Nature* 469: 302–303.
18. Bonanno G, Caldarelli G, Lillo F, Mantegna RN (2003) Topology of correlation-based minimal spanning trees in real and model markets. *Phys Rev E* 68: 46130.
19. Brun C, Chevenet F, Martin D, Wojcik J, Guénoche A, et al. (2003) Functional classification of proteins for the prediction of cellular function from a protein-protein interaction network. *Genome biology* 5.
20. Auconi P, Caldarelli G, Scala A, Ierardo G, Polimeni A (2011) A network approach to orthodontic diagnosis. *Orthodontics & Craniofacial Research* 14: 189–197.
21. Scala A, Auconi P, Scazzocchio M, Caldarelli G, McNamara J, et al. (2012) Using networks to understand medical data: the case of class iii malocclusions. *PLoS ONE*.
22. Mantegna RN (1999) Hierarchical structure in financial markets. *European Physical Journal B* 11: 193–197.
23. Mantegna RN, Stanley HE (2000) *An Introduction to Econophysics: Correlations and Complexity in Finance*. Cambridge Univ. Press, Cambridge UK.
24. Girvan M, Newman MEJ (2002) Community structure in social and biological networks. *Proceedings of the National Academy of Sciences* 99: 7821–7826.
25. Fortunato S (2010) Community detection in graphs. *Physics Reports* 486: 75–174.
26. Farmer JD, Lo AW (1999) Frontiers of finance: Evolution and efficient markets. *Proceedings of the National Academy of Sciences* 96: 9991–9992.
27. Chi Ho Yeung YCZ (2009) *Minority Games*, Springer. 5588–5604.
28. De Masi G, Iori G, Caldarelli G (2006) Fitness model for the Italian interbank money market. *Phys Rev E* 74: 66112.
29. Garlaschelli D, Loffredo MI (2004) Fitness-Dependent Topological Properties of the World Trade Web. *Phys Rev Lett* 93: 188701.
30. Podobnik B, Horvatic D, Petersen AM, Urošević B, Stanley HE (2010) Bankruptcy risk model and empirical tests. *Proceedings of the National Academy of Sciences*.
31. Buldyrev SV, Parshani R, Paul G, Stanley HE, Havlin S (2010) Catastrophic cascade of failures in interdependent networks. *Nature* 464: 1025–1028.
32. Capocci A, Caldarelli G (2008) Taxonomy and clustering in collaborative systems: the case of the on-line encyclopedia Wikipedia. *EPL* 81: 28006.
33. Garlaschelli D, Capocci A, Caldarelli G (2007) Self-organized network evolution coupled to extremal dynamics. *Nature Physics* 3: 813–817.
34. Shamma JS (2008) *Cooperative Control of Distributed Multi-Agent Systems*. Wiley-Interscience. ISBN 978-0-470-06031-5.
35. Page L, Brin S, Motwami R, Winograd T (1999) The PageRank citation ranking: bringing order to the web. Stanford InfoLab University website, Accessed 2012 Sep 19. URL <http://dbpubs.stanford.edu:8090/pub/1999-66>.
36. Bonacich P (1987) Power and Centrality: A Family of Measures. *American Journal of Sociology* 92: 1170–1182.
37. Zlatić V, Gabrielli A, Caldarelli G (2010) Topologically biased random walk and community finding in networks. *Physical Review E* 82: 066109+.
38. Arrow KJ, Dasgupta P, Goulder LH, Mumford KJ, Oleson K (2010) Sustainability and the Measurement of Wealth. National Bureau of Economic Research Working Paper Series : 16599+.
39. Dasgupta P (2009) The Place of Nature in Economic Development. Ideas Website, Accessed 2012 Sep 19. Technical report. URL <http://ideas.repec.org/p/ess/wpaper/id2233.html>.
40. Dasgupta P (2010) Poverty traps: Exploring the complexity of causation. International Food Policy Research Institute (IFPRI) 2010 Vision briefs BB07 Special Edition.
41. Tacchella A, Cristelli M, Caldarelli G, Gabrielli A, Pietronero L (2012) Economic complexity: a new metric for countries' competitiveness and products' complexity. submitted to *Journal of Economic Dynamics and Control*.
